# Supplementary material for: Excessive Iron Induces Oxidative Stress Promoting Cellular Perturbations and Insulin Secretory Dysfunction in MIN6 Beta Cells
Source: MDPI journal article supplement (doi:10.3390/cells10051141), 2021-05-09
Supplement: s1 [file s1]

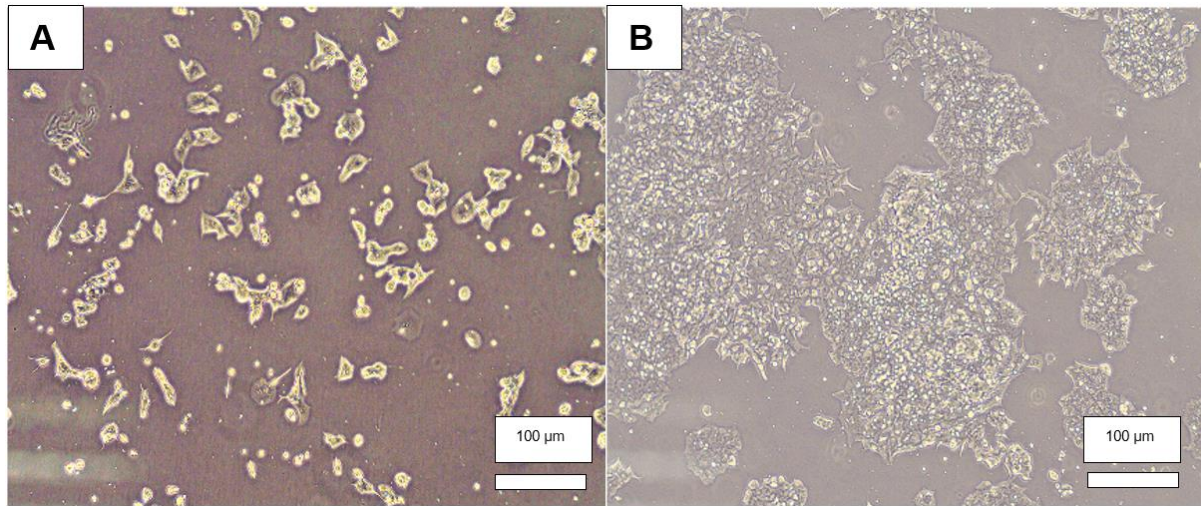

**Figure S1.** Growth pattern of MIN6 cells into mature pseudoislets. Stock MIN6 cell cultures were grown at 37°C in 75 cm<sup>2</sup> T-flasks, replacing the medium every two days. Cells were seeded in 12-well plates with density of  $25 \times 10^4$  cells/cm<sup>2</sup> for all experimental cultures (panel A). MIN6 cells reached confluence on day 3 post-seeding by which point the phenotype of small clusters of cells (pseudoislets) was formed, indicating the cells were functional and capable of secreting insulin (panel B). Cells were imaged through a microscope at 10X magnification.
